# Supplementary material for: SMASH, a fragmentation and sequencing method for genomic copy number analysis
Source: HighWire-hosted journal article supplement (doi:10.1101/gr.201491.115), 2016-04-14
Supplement: Supp_Material.pdf [file Supp_Material.pdf]

Supplemental Tables

| base pairs | mode     | maps/read | S/N   | autocorrelation |
|------------|----------|-----------|-------|-----------------|
| 36         | SE       | 0.727     | 5.609 | 0.023           |
| 36         | PE       | 0.703     | 5.606 | 0.021           |
| 36         | PE as SE | 0.798     | 5.647 | 0.020           |
| 50         | SE       | 0.746     | 5.620 | 0.019           |
| 50         | PE       | 0.710     | 5.621 | 0.018           |
| 50         | PE as SE | 0.807     | 5.618 | 0.020           |
| 76         | SE       | 0.706     | 5.656 | 0.016           |
| 76         | PE       | 0.632     | 5.596 | 0.019           |
| 76         | PE as SE | 0.751     | 5.640 | 0.018           |
| 101        | SE       | 0.560     | 5.562 | 0.019           |
| 101        | PE       | 0.480     | 5.438 | 0.020           |
| 101        | PE as SE | 0.603     | 5.601 | 0.018           |
| 101        | SMASH    | 3.096     | 5.289 | 0.019           |

**Supplemental Table S1. WGS mode optimization for CNV detection.** To determine the optimal read length and mapping method for copy number by low-coverage WGS, we clipped 101 bp paired-end reads to lengths equivalent of common run types. Reads were mapped using Bowtie in the following modes: (1) “SE,” uses read 1 only; (2) “PE,” uses read 1 and read 2 mapped in paired-end mode keeping only concordant pairs; and (3) “PE as SE,” uses read 1 and read 2, selecting the map from read 2 when read 1 is unmapped. To determine the performance characteristics of each mapping method, we select 10 million maps across 100 thousand bins to compute signal to noise (“S/N”) and autocorrelation as described in Table 1. SMASH data are shown here for comparison with values as in Table 2 for 100,000 bins at 100 maps per bin.

| sample   | all read | ignore 3' excess | ignore all excess |
|----------|----------|------------------|-------------------|
| 12596_fa | 0.758    | 0.880            | 0.977             |
| 12596_mo | 0.756    | 0.879            | 0.977             |
| 12596_p1 | 0.754    | 0.876            | 0.977             |
| 12596_s1 | 0.763    | 0.884            | 0.977             |
| 12605_fa | 0.750    | 0.874            | 0.976             |
| 12605_mo | 0.756    | 0.879            | 0.977             |
| 12605_p1 | 0.756    | 0.880            | 0.977             |
| 12605_s1 | 0.755    | 0.879            | 0.977             |
| skbr3    | 0.737    | 0.850            | 0.926             |

**Supplemental Table S2. Proportion of bases in read 1 that pass the 20:4 rule.** For each sample, we compute the proportion of bases that are included in a valid 20:4 map ("all read"). We also consider just the proportion of bases in a valid map excluding the bases that occur at the end of the read ("ignore 3' excess"). This is for two reasons: 1) the 3' end of the read is typically of lower quality, and 2) the fragment at the end of the read may not have a sufficient number of bases to qualify as a match. If we exclude unmapped bases on both ends of the read ("ignore all excess"), then nearly every base is used (>97%).

| type  | # of bins | maps per bin | autosomal auto-correlation | autosomal median | X Chrom median | autosomal MAD | X Chrom MAD | signal to noise | S/N from Table 2 |
|-------|-----------|--------------|----------------------------|------------------|----------------|---------------|-------------|-----------------|------------------|
| SMASH | 50000     | 20           | 0.006                      | 2.020            | 1.120          | 0.295         | 0.161       | 2.679           | 2.497            |
| WGS   | 50000     | 20           | 0.002                      | 2.021            | 1.079          | 0.296         | 0.160       | 2.800           | 2.659            |
| SMASH | 50000     | 50           | 0.009                      | 2.005            | 1.074          | 0.193         | 0.106       | 4.234           | 3.933            |
| WGS   | 50000     | 50           | 0.008                      | 2.005            | 1.036          | 0.192         | 0.099       | 4.480           | 4.173            |
| SMASH | 50000     | 100          | 0.015                      | 2.002            | 1.060          | 0.140         | 0.077       | 5.886           | 5.487            |
| WGS   | 50000     | 100          | 0.013                      | 2.002            | 1.026          | 0.140         | 0.074       | 6.149           | 5.861            |
| SMASH | 100000    | 20           | 0.003                      | 2.020            | 1.116          | 0.298         | 0.159       | 2.681           | 2.481            |
| WGS   | 100000    | 20           | 0.005                      | 2.020            | 1.078          | 0.299         | 0.157       | 2.788           | 2.633            |
| SMASH | 100000    | 50           | 0.016                      | 2.006            | 1.074          | 0.197         | 0.108       | 4.148           | 3.833            |
| WGS   | 100000    | 50           | 0.008                      | 2.005            | 1.039          | 0.197         | 0.102       | 4.368           | 4.102            |
| SMASH | 100000    | 100          | 0.024                      | 2.002            | 1.061          | 0.146         | 0.078       | 5.697           | 5.289            |
| WGS   | 100000    | 100          | 0.017                      | 2.002            | 1.024          | 0.145         | 0.077       | 5.979           | 5.633            |
| SMASH | 500000    | 20           | 0.009                      | 2.021            | 1.113          | 0.317         | 0.170       | 2.524           | 2.342            |
| WGS   | 500000    | 20           | 0.008                      | 2.020            | 1.078          | 0.315         | 0.163       | 2.657           | 2.492            |
| SMASH | 500000    | 50           | 0.018                      | 2.006            | 1.075          | 0.225         | 0.116       | 3.677           | 3.410            |
| WGS   | 500000    | 50           | 0.017                      | 2.005            | 1.037          | 0.222         | 0.109       | 3.906           | 3.656            |
| SMASH | 500000    | 100          | 0.028                      | 2.001            | 1.060          | 0.182         | 0.090       | 4.622           | 4.319            |
| WGS   | 500000    | 100          | 0.026                      | 2.001            | 1.025          | 0.179         | 0.084       | 4.939           | 4.649            |

**Supplemental Table S3. Empirical bin boundaries.** The computations of Table 2 are repeated using bins of uniform observation of a reference instead of bins of uniform expectation. In this approach, bin boundaries are defined empirically; bins are established with the same number of maps as determined empirically. The signal to noise is improved over the results in Table 2 (“S/N from Table 2”), with little change to autocorrelation.

| type  | # of bins | maps<br>per bin | autosomal            |                     | X Chrom<br>median | autosomal<br>MAD | X Chrom<br>MAD | signal to<br>noise |
|-------|-----------|-----------------|----------------------|---------------------|-------------------|------------------|----------------|--------------------|
|       |           |                 | auto-<br>correlation | autosomal<br>median |                   |                  |                |                    |
| SMASH | 50000     | 20              | 0.002                | 2.027               | 1.112             | 0.416            | 0.272          | 1.840              |
| SMASH | 100000    | 20              | 0.004                | 2.028               | 1.122             | 0.415            | 0.279          | 1.812              |
| SMASH | 500000    | 20              | 0.003                | 2.025               | 1.112             | 0.417            | 0.279          | 1.819              |
| SMASH | 50000     | 50              | 0.004                | 2.019               | 1.075             | 0.270            | 0.176          | 2.928              |
| SMASH | 100000    | 50              | 0.005                | 2.018               | 1.077             | 0.269            | 0.180          | 2.907              |
| SMASH | 500000    | 50              | 0.011                | 2.019               | 1.076             | 0.271            | 0.178          | 2.908              |
| SMASH | 50000     | 100             | 0.005                | 2.003               | 1.058             | 0.190            | 0.124          | 4.160              |
| SMASH | 100000    | 100             | 0.009                | 2.005               | 1.061             | 0.190            | 0.126          | 4.130              |
| SMASH | 500000    | 100             | 0.021                | 2.005               | 1.059             | 0.194            | 0.128          | 4.073              |
| WGS   | 50000     | 20              | 0.004                | 2.034               | 1.080             | 0.413            | 0.261          | 1.953              |
| WGS   | 100000    | 20              | 0.001                | 2.032               | 1.075             | 0.414            | 0.261          | 1.955              |
| WGS   | 500000    | 20              | 0.003                | 2.030               | 1.078             | 0.413            | 0.263          | 1.944              |
| WGS   | 50000     | 50              | 0.003                | 2.017               | 1.036             | 0.267            | 0.164          | 3.132              |
| WGS   | 100000    | 50              | 0.006                | 2.016               | 1.039             | 0.266            | 0.168          | 3.111              |
| WGS   | 500000    | 50              | 0.012                | 2.016               | 1.040             | 0.267            | 0.168          | 3.095              |
| WGS   | 50000     | 100             | 0.008                | 2.003               | 1.017             | 0.189            | 0.114          | 4.452              |
| WGS   | 100000    | 100             | 0.011                | 2.003               | 1.022             | 0.189            | 0.118          | 4.400              |
| WGS   | 500000    | 100             | 0.025                | 2.003               | 1.024             | 0.189            | 0.119          | 4.385              |

**Supplemental Table S4. Matching reference and sample coverage.** Performance statistics are computed as in Table 2, but here the same number of maps for both the sample and the reference for each choice of bin resolution (50K, 100K, 500K) and for each map coverage (20, 50 and 100 reads/bin) are used. When the number of maps is equalized between sample and reference, the signal to noise is largely insensitive to bin resolution and depends strongly on map coverage for both WGS and SMASH, indicating that resolution is only limited by the depth of coverage.

**Supplemental Table S5. SMASH and WGS segmentation comparisons (.xlsx file).** The spreadsheet contains four labeled worksheets, containing the segmentation data depicted in Figs. 3 and 4. Both the family and SKBR3 data are normalized and segmented using either the SMASH or the WGS data to determine segment boundaries. For those segments, we compute the mean and standard deviation of the bins contained in that segment for both WGS and SMASH providing a detailed comparison of segment averages. Overall, SMASH and WGS are strongly concordant regardless of the data used for segmentation.

| run type | mode     | maps /read | lane cost | cost/genome (20 kb res) | cost/genome (10 kb res) | cost/library | total cost (20 kb) | total cost (10 kb) |
|----------|----------|------------|-----------|-------------------------|-------------------------|--------------|--------------------|--------------------|
| 1x36     | SE       | 0.727      | 1162      | 47.93                   | 95.87                   | 16.95        | 64.88              | 112.82             |
| 2x50     | PE as SE | 0.807      | 1819      | 67.58                   | 135.17                  | 16.95        | 84.53              | 152.12             |
| 2x125    | SMASH    | 4.470      | 2670      | 17.92                   | 35.84                   | 18.10        | 36.02              | 53.94              |

**Supplemental Table S6. SMASH and WGS analysis cost comparisons.** We calculated costs (USD) of sample analysis on a HiSeq 2500 instrument (Illumina) using 2 optimal run modes for WGS and SMASH. Costs are calculated at current (early 2016) levels using CSHL Genome Center pricing. SMASH and WGS library preparation is similar in cost and time, but the increased number of maps/read from SMASH makes it substantially more cost-effective than low coverage WGS for high-resolution copy number analysis. Average bin size is expressed in kb.

## Supplemental Methods

### SMASH2 Protocol

The revised SMASH protocol utilizes a single NEBNext dsDNA fragmentase (NEB, M0348L) digestion step in place of the sonication steps and restriction enzyme digestion from the original protocol. 200 ng of genomic DNA are digested for 10 min at 37°C in a 10 µl reaction with 1 µl of dsDNA fragmentase, 1 µl 10X dsDNA fragmentase reaction buffer and 0.5 µl 20mM MgCl<sub>2</sub>. Following this step, end repair is performed for 30 min at 20°C in the same reaction tube by adding 2 µl 10 mM dNTPs, 1 µl (3U/µl) T4 DNA pol, 0.5 µl Klenow (5U/µl), 1 µl (10U/µl) T4 PNK and 4.5 µl H<sub>2</sub>O to a total reaction volume of 20 µl. Following this step, the reaction mix is size-selected with 2.5 volumes of AMPure XP beads and purified via the Qiagen nucleotide removal kit. Subsequent steps are identical to the original protocol (Methods).

In addition to the changes noted above, all enzyme heat-killing steps have been eliminated from the SMASH2 protocol. The overall time required for the SMASH2 protocol has been reduced by ~1 hour and cost reduced by nearly 50% relative to the original protocol.

### Source Code and Bin Boundaries

The 1) longMEM package, SMASH mapping heuristics, map counting and copy number profiles and 2) bin boundaries are available as respective .zip archives.

- 1) Wang et al.\_Supplemental\_Information\_\_code.zip
- 2) Wang et al.\_Supplemental\_Information\_\_bins.zip
