# Supplementary material for: SMASH, a fragmentation and sequencing method for genomic copy number analysis
Source: HighWire-hosted journal article supplement (doi:10.1101/gr.201491.115), 2016-04-14
Supplement: Supplemental_Figure_S2.pdf [file Supplemental_Figure_S2.pdf]

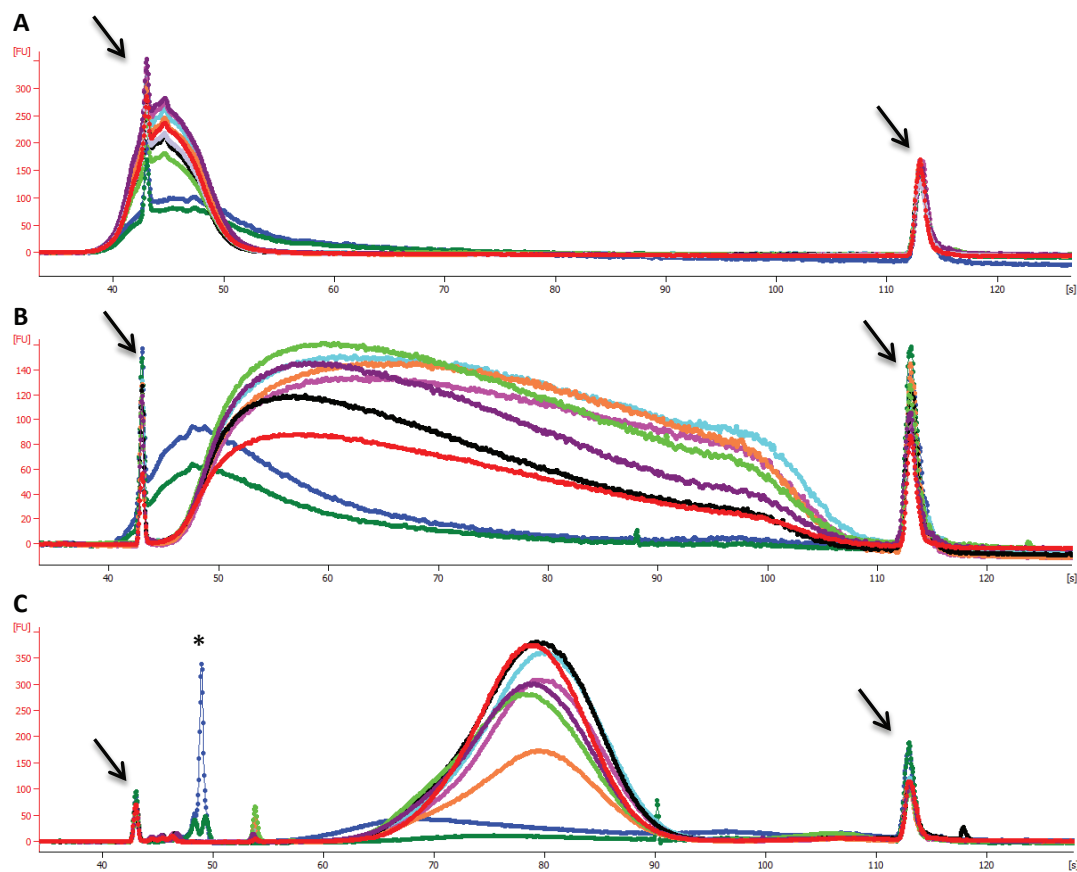

**Supplemental Figure S2. Bioanalyzer results of SMASH protocols on independent samples.** Lower (35 bp) and upper markers (10.38 kb) are indicated by arrows. In each panel, there are two profiles (blue and green) showing results for bad quality DNA samples. The remaining curves are of good quality. A) The curves show the size distribution of DNA molecules after fragmentation. Blue and green curves show a wider length range and longer average length of DNA fragments than other samples. B) After random ligation of DNA fragments, curves from good samples show a wide length range of chimeric DNA molecules. C) For the final sequencing libraries, curves from most samples show lengths ranging from 250–700 bp. The failed libraries show mainly sequencing adapter dimers (highlighted by asterisk). “FU” in the Bioanalyzer plots refers to relative fluorescence units.
