# Supplementary material for: SMASH, a fragmentation and sequencing method for genomic copy number analysis
Source: HighWire-hosted journal article supplement (doi:10.1101/gr.201491.115), 2016-04-14
Supplement: Supplemental_Figure_S4.pdf [file Supplemental_Figure_S4.pdf]

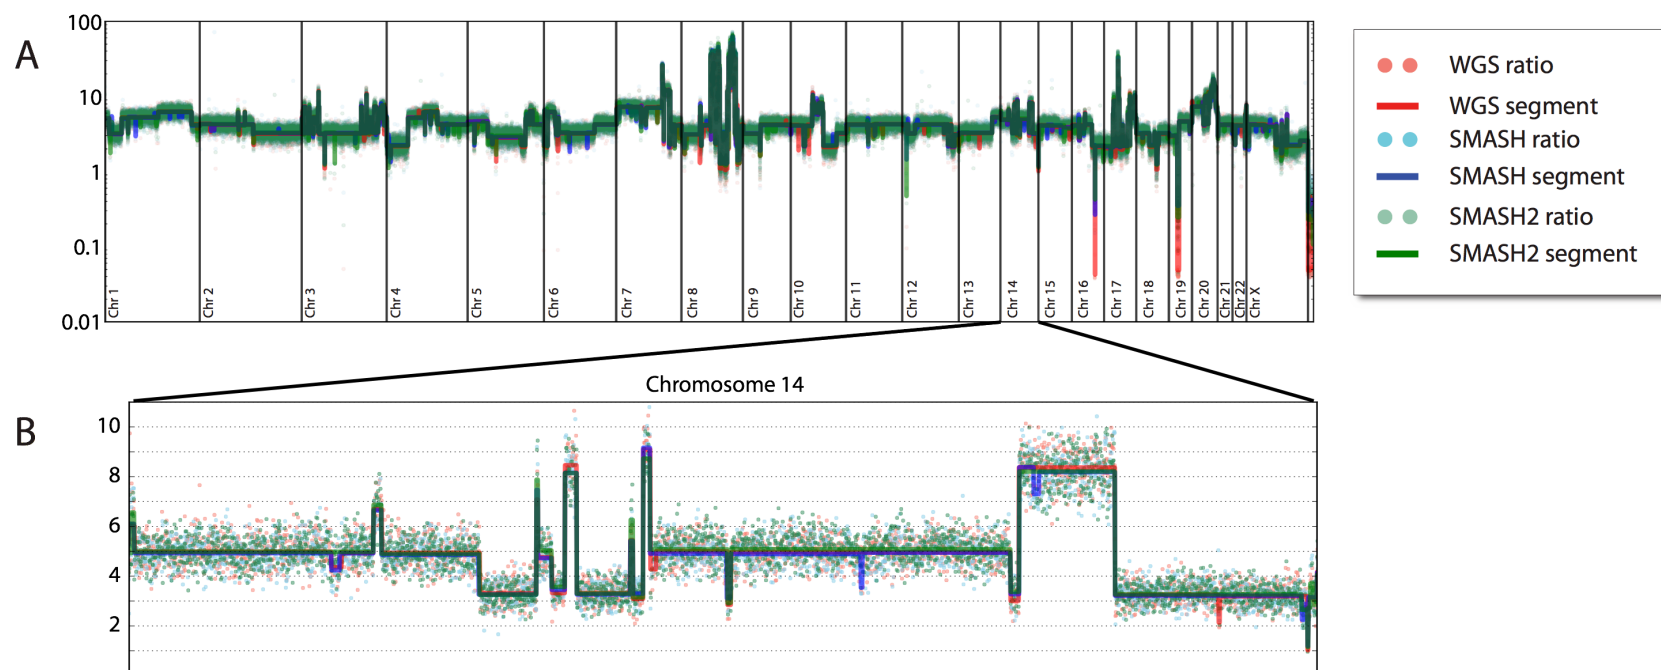

**Supplemental Figure S4. SMASH2 compared to WGS and SMASH in the SKBR3 cell line.** As in Fig. 4A and 4B, the agreement of the newer SMASH protocol (SMASH2) with both WGS and the previous SMASH protocol is displayed. Overall, the three methods show nearly complete agreement, with only minor differences resulting from variation in CBS segmentation profiles
